# Supplementary material for: Design and synthesis of BODIPY-clickate based Hg2+ sensors: the effect of triazole binding mode with Hg2+ on signal transduction
Source: Royal Society of Chemistry journal article supplement (doi:10.1039/c5dt04042f), 2015-12-21
Supplement: c5dt04042f1.pdf [file c5dt04042f1.pdf]

## Electronic Supporting Information

### Design and synthesis of BODIPY-Clickates based Hg<sup>2+</sup> sensors: Effect of triazole binding mode with Hg<sup>2+</sup> on signal transduction

Mani Vedamalai,<sup>a</sup> Dhaval Kedaria,<sup>b</sup> Rajesh Vasita,<sup>b</sup> Shigeki Mori<sup>c</sup> and Iti Gupta<sup>a,\*</sup>

<sup>a,\*</sup>Indian Institute of Technology Gandhinagar, VGEC Campus, Chandkheda, Ahmedabad-382424, India.

Corresponding author E.mail: iti@iitgn.ac.in.

<sup>b</sup> School of Life Sciences, Central University of Gujarat, Gandhinagar, Gujarat, India.

<sup>c</sup> Integrated Centre for Sciences, Ehime University, Matsuyama, 790-8577, Japan.

| List of contents                                                                                                | page no |
|-----------------------------------------------------------------------------------------------------------------|---------|
| 1. Crystal data refinement parameters of Compound <b>3</b>                                                      | S2      |
| 2. Crystal data refinement parameters of Compound <b>4</b>                                                      | S3      |
| 3. Photo physical properties of <b>F1</b> , <b>F2</b> , <b>4</b> , and <b>3</b>                                 | S3      |
| 4. Solvatochromism pictures of <b>3</b> , <b>4</b> , <b>F1</b> and <b>F2</b>                                    | S4      |
| 5. Fluorescence titration of <b>F2</b> with metal ions                                                          | S5      |
| 6. UV- visible titration of <b>F2</b> with metal ions                                                           | S5      |
| 7. UV- visible titration of <b>F1</b> with Hg <sup>2+</sup> (a) and <b>F2</b> with Hg <sup>2+</sup> (b)         | S6      |
| 8. Calculation of apparent dissociation constant                                                                | S6      |
| 9. Competitive test of <b>F2</b>                                                                                | S7      |
| 10. Job's plot for <b>F2</b> :Hg <sup>2+</sup> complexes                                                        | S7      |
| 11. ESI mass spectra of <b>F1</b> -Hg <sup>2+</sup> complexes (a) and <b>F2</b> -Hg <sup>2+</sup> complexes (b) | S8      |
| 12. Effect of pH                                                                                                | S9      |
| 13. NMR titration of <b>F2</b> against Hg <sup>2+</sup> in DMSO-d <sub>6</sub>                                  | S9      |
| 14. <sup>1</sup> H spectrum of Compound <b>2</b> in CDCl <sub>3</sub>                                           | S10     |
| 15. <sup>13</sup> C spectrum of Compound <b>2</b> in CDCl <sub>3</sub>                                          | S10     |

|                                                                               |     |
|-------------------------------------------------------------------------------|-----|
| 16. <sup>1</sup> H spectrum of Compound <b>3</b> in CDCl <sub>3</sub>         | S11 |
| 17. <sup>13</sup> C spectrum of Compound <b>3</b> in CDCl <sub>3</sub>        | S11 |
| 18. <sup>1</sup> H spectrum of Compound <b>4</b> in CDCl <sub>3</sub>         | S12 |
| 19. <sup>13</sup> C spectrum of Compound <b>4</b> in CDCl <sub>3</sub>        | S12 |
| 20. <sup>1</sup> H spectrum of Compound <b>F1</b> in CDCl <sub>3</sub>        | S13 |
| 21. <sup>13</sup> C spectrum of Compound <b>F1</b> in CDCl <sub>3</sub>       | S13 |
| 22. <sup>1</sup> H COSY spectrum of Compound <b>F1</b> in CDCl <sub>3</sub>   | S14 |
| 23. <sup>1</sup> H spectrum of Compound <b>F2</b> in DMSO-d <sub>6</sub>      | S14 |
| 24. <sup>13</sup> C spectrum of Compound <b>F2</b> in DMSO-d <sub>6</sub>     | S15 |
| 25. <sup>1</sup> H COSY spectrum of Compound <b>F2</b> in DMSO-d <sub>6</sub> | S15 |

|                      |                                                                                      |
|----------------------|--------------------------------------------------------------------------------------|
| Empirical Formula    | C <sub>19</sub> H <sub>18</sub> BCl <sub>2</sub> F <sub>2</sub> N <sub>3</sub>       |
| Formula Weight       | 408.08                                                                               |
| Crystal Color, Habit | orange, platelet                                                                     |
| Crystal Dimensions   | 0.250 X 0.160 X 0.020 mm                                                             |
| Crystal System       | orthorhombic                                                                         |
| Lattice Type         | Primitive                                                                            |
| Lattice Parameters   | a = 25.408(9) Å<br>b = 8.297(3) Å<br>c = 8.766(3) Å<br>V = 1848.0(11) Å <sup>3</sup> |
| Space Group          | Pca2 <sub>1</sub> (#29)                                                              |

**Table S1.** Crystal data refinement parameters of Compound **3**

|                      |                                                                                                            |
|----------------------|------------------------------------------------------------------------------------------------------------|
| Empirical Formula    | C <sub>19</sub> H <sub>18</sub> BF <sub>2</sub> N <sub>9</sub>                                             |
| Formula Weight       | 421.22                                                                                                     |
| Crystal Color, Habit | orange, needle                                                                                             |
| Crystal Dimensions   | 0.200 X 0.100 X 0.020 mm                                                                                   |
| Crystal System       | monoclinic                                                                                                 |
| Lattice Type         | Primitive                                                                                                  |
| Lattice Parameters   | a = 12.295(6) Å<br>b = 20.765(10) Å<br>c = 7.858(4) Å<br>β = 100.122(9) °<br>V = 1975.1(17) Å <sup>3</sup> |
| Space Group          | P2 <sub>1</sub> /c (#14)                                                                                   |

**Table S2.** Crystal data refinement parameters of Compound 4

| Solvents     | <b>F1</b>                    |                             |                   | <b>F2</b>                    |                             |                   | <b>4</b>                     |                             |                   | <b>3</b>                     |                             |                   |
|--------------|------------------------------|-----------------------------|-------------------|------------------------------|-----------------------------|-------------------|------------------------------|-----------------------------|-------------------|------------------------------|-----------------------------|-------------------|
|              | $\lambda_{\text{abs}}$<br>nm | $\lambda_{\text{em}}$<br>nm | $\Phi_{\text{f}}$ |
| Ethanol      | 495                          | 509                         | 0.004             | 495                          | 513                         | 0.004             | 494                          | 500                         | 0.002             | 495                          | 513                         | 0.003             |
| Acetonitrile | 491                          | 513                         | 0.001             | 492                          | 495                         | 0.001             | 492                          | 515                         | 0.001             | 493                          | 500                         | 0.001             |
| Methanol     | 494                          | 515                         | 0.002             | 494                          | 514                         | 0.002             | 493                          | 513                         | 0.001             | 493                          | 504                         | 0.001             |
| DCM          | 498                          | 605                         | 0.072             | 498                          | 605                         | 0.114             | 497                          | 615                         | 0.020             | 497                          | 616                         | 0.050             |
| Hexanes      | 497                          | 511                         | 0.107             | 509                          | 512                         | 0.136             | 497                          | 511                         | 0.190             | 497                          | 511                         | 0.162             |
| THF          | 496                          | 623                         | 0.028             | 496                          | 618                         | 0.036             | 496                          | 511,<br>627                 | 0.013             | 496                          | 629                         | 0.019             |
| DMF          | 494                          | 504                         | 0.001             | 494                          | 508                         | 0.001             | 493                          | 506                         | 0.001             | 495                          | 505                         | 0.001             |

**Table S3.** Photophysical properties of **F1**, **F2**, **4**, and **3** in various solvents.

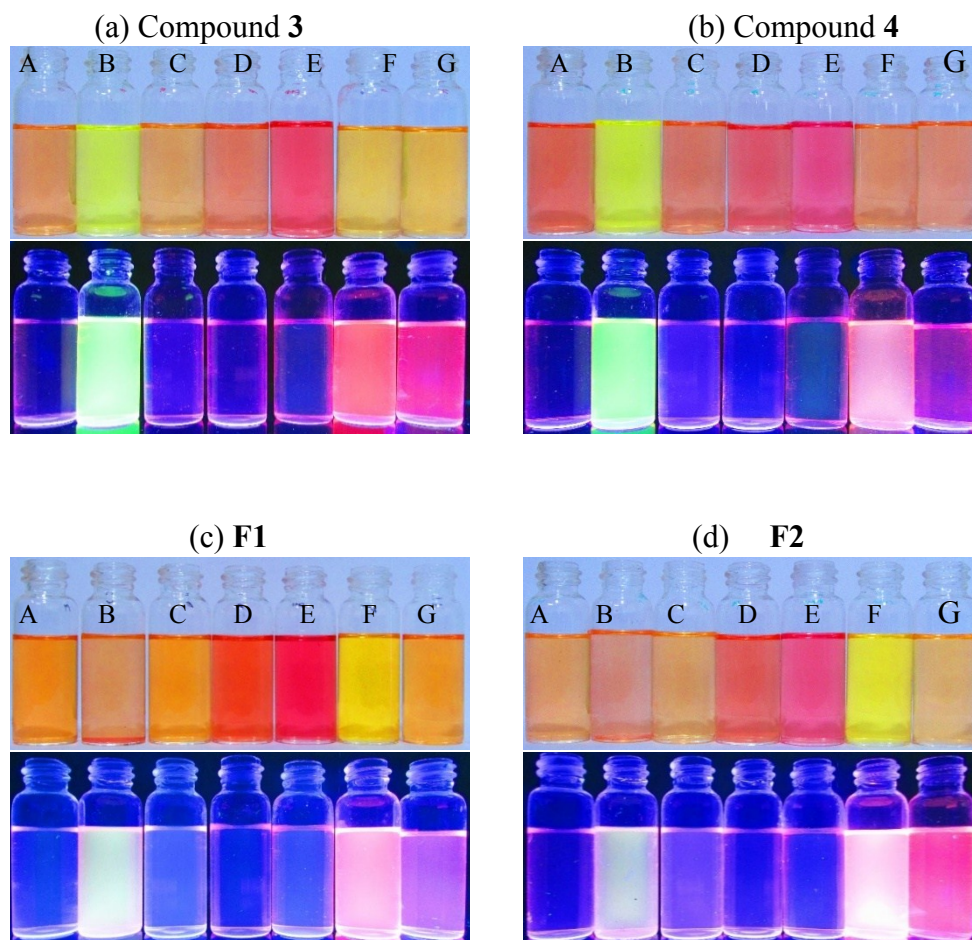

**Figure S1.** Solvatochromism of compound **3**, **4**, **F1** and **F2** in various solvents (A) methanol, (B) hexanes (C) ethanol, (D) acetonitrile, (E) dimethyl formamide, (F) dichloromethane, and (G) tetrahydrofuran. Visible (top) and long wavelength (below) pictures of compound **3** (a), **4** (b), **F1** (c) and **F2** (d) in various solvents.

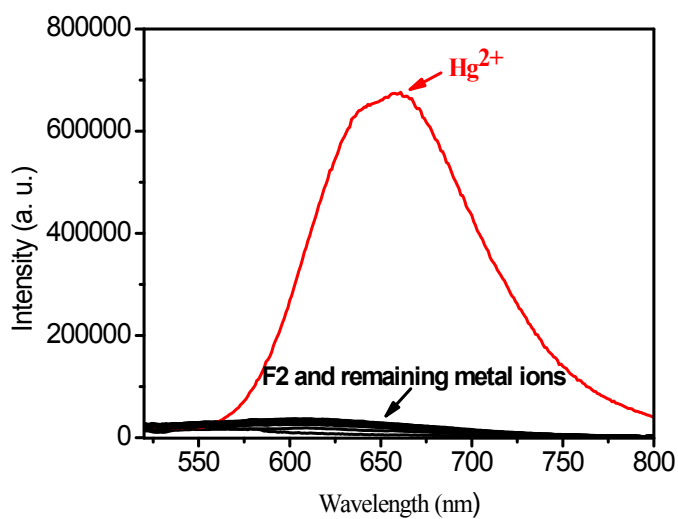

**Figure S2.** Fluorescence spectra of **F2** (10  $\mu\text{M}$ ) upon addition of 3 equivalent of various metal ions ( $\text{Ag}^+$ ,  $\text{Ca}^{2+}$ ,  $\text{Cd}^{2+}$ ,  $\text{Co}^{2+}$ ,  $\text{Cu}^{2+}$ ,  $\text{Fe}^{3+}$ ,  $\text{Fe}^{2+}$ ,  $\text{K}^+$ ,  $\text{Mg}^{2+}$ ,  $\text{Mn}^{2+}$ ,  $\text{Ni}^{2+}$ ,  $\text{Pb}^{2+}$ ,  $\text{Zn}^{2+}$  and  $\text{Hg}^{2+}$  in methanol ( $\lambda_{\text{ex}} = 494 \text{ nm}$ ).

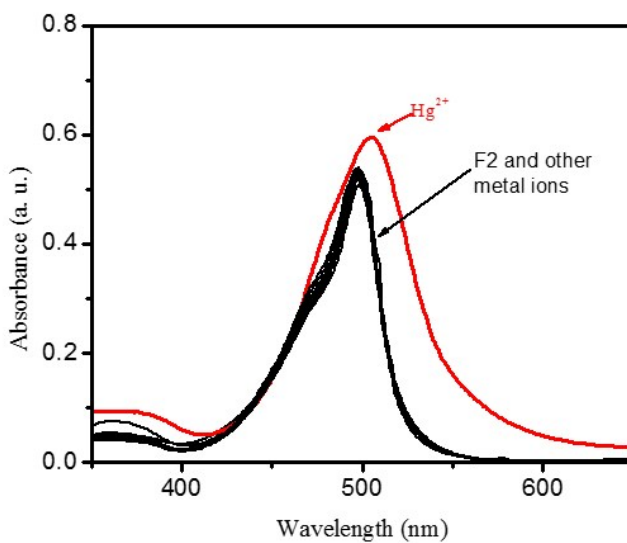

**Figure S3.** UV-visible spectra of **F2** (10  $\mu\text{M}$ ) upon addition of 3 equivalent of various metal ions ( $\text{Ag}^+$ ,  $\text{Ca}^{2+}$ ,  $\text{Cd}^{2+}$ ,  $\text{Co}^{2+}$ ,  $\text{Cu}^{2+}$ ,  $\text{Fe}^{3+}$ ,  $\text{Fe}^{2+}$ ,  $\text{K}^+$ ,  $\text{Mg}^{2+}$ ,  $\text{Mn}^{2+}$ ,  $\text{Ni}^{2+}$ ,  $\text{Pb}^{2+}$ ,  $\text{Zn}^{2+}$  and  $\text{Hg}^{2+}$  in methanol.

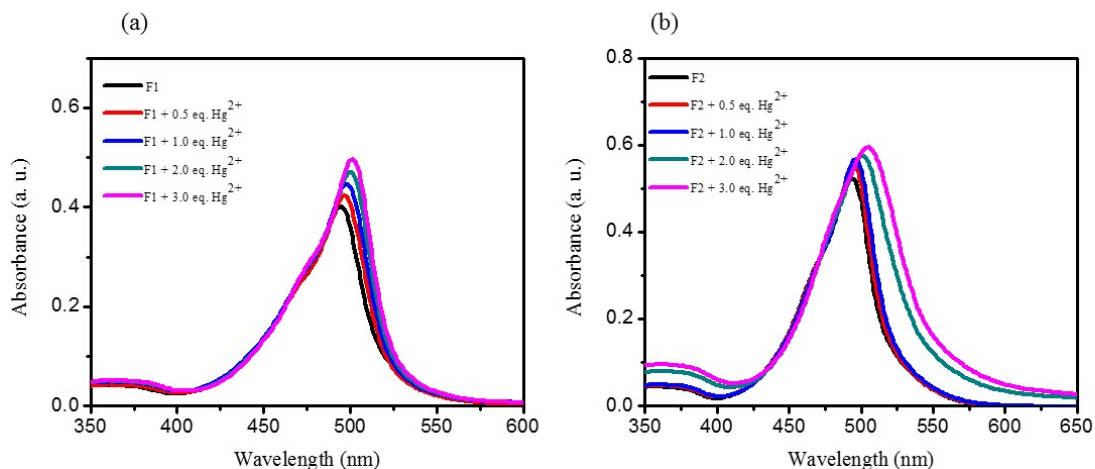

**Figure S4.** (a) UV-visible response of **F1** (10 μM) in the presence of different amounts of Hg<sup>2+</sup> in methanol. (b) UV-visible response of **F2** (10 μM) in the presence of different amounts of Hg<sup>2+</sup> in methanol.

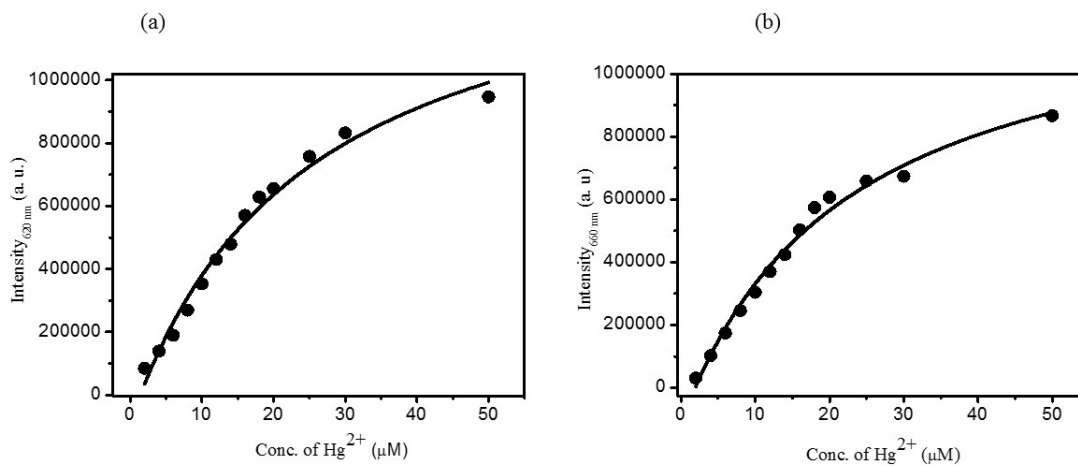

**Figure S5.** (a) Fluorescence responses of **F1** (10 μM) to Hg<sup>2+</sup> solutions for  $K_d$  value calculation. Excitation was 494 nm. Spectra were acquired against increasing amount of Hg<sup>2+</sup> 0, 2, 4, 6, 8, 10, 12, 14, 16, 18, 20, 25, 30, and 50 μM. The apparent  $K_d$  value was found to be  $24.4 \pm 5.1$  μM. (b) Fluorescence responses of **F2** (10 μM) to Hg<sup>2+</sup> solutions for  $K_d$  value calculation. Excitation was 494 nm. Spectra were acquired against increasing amount of Hg<sup>2+</sup> 0, 2, 4, 6, 8, 10, 12, 14, 16, 18, 20, 25, 30, and 50 μM. The apparent  $K_d$  value was found to be  $22.0 \pm 3.9$  μM.

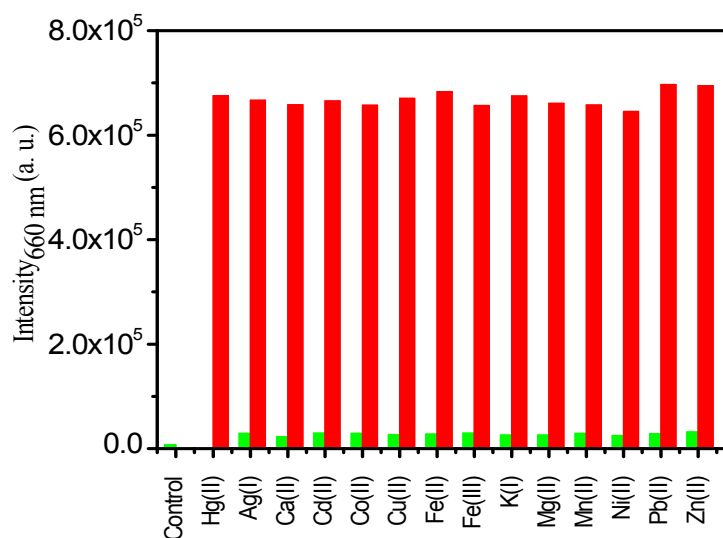

**Figure S6.** Relative fluorescence intensities of **F2** (10  $\mu\text{M}$ ) in the presence of  $\text{Hg}^{2+}$  (3 equiv.) and various metal ions (15 equiv.) in methanol, ( $\lambda_{\text{ex}} = 494 \text{ nm}$ ). Green bars represent **F2** and 150  $\mu\text{M}$  of other competing metal ions, red bars represent subsequent addition of 30  $\mu\text{M}$  of  $\text{Hg}^{2+}$  to **F2** and **F2** with competing metal ions (150  $\mu\text{M}$ ).

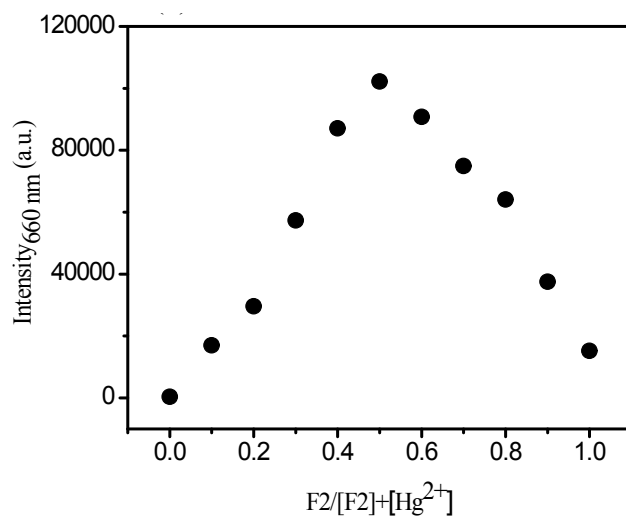

**Figure S7.** Job plot of **F2-Hg<sup>2+</sup>** complexes in methanol ( $\lambda_{\text{ex}} = 494 \text{ nm}$ ). The total concentration of **F2** and  $\text{Hg}^{2+}$  was 10  $\mu\text{M}$

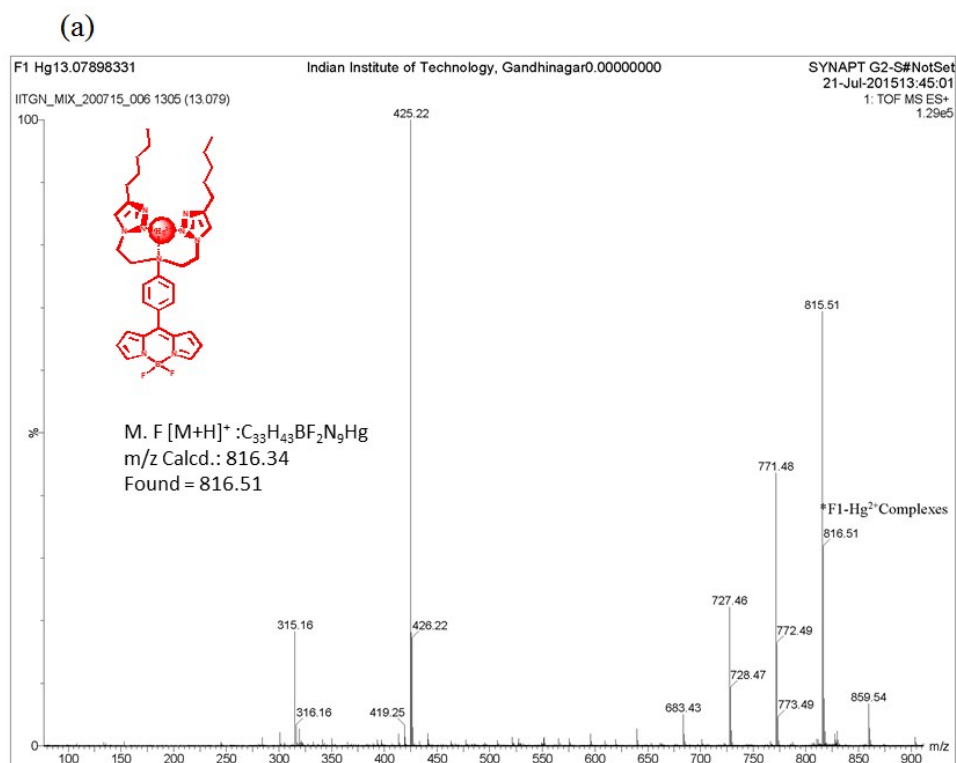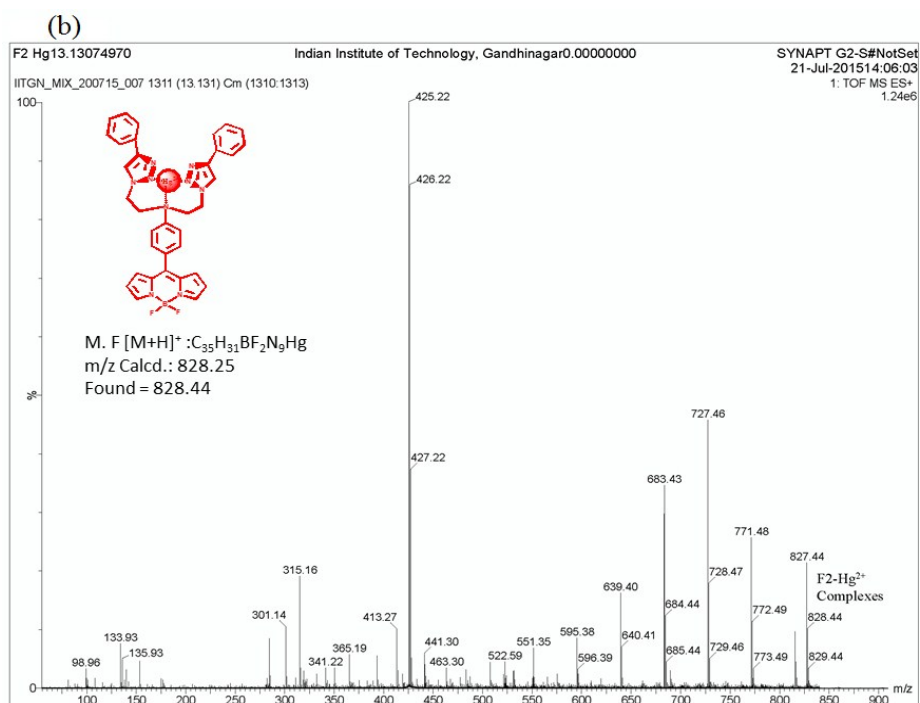

**Figure S8.** (a) ESI MS spectra of **F1-Hg<sup>2+</sup>** Complexes. (b) ESI MS spectra of **F2-Hg<sup>2+</sup>** Complexes.



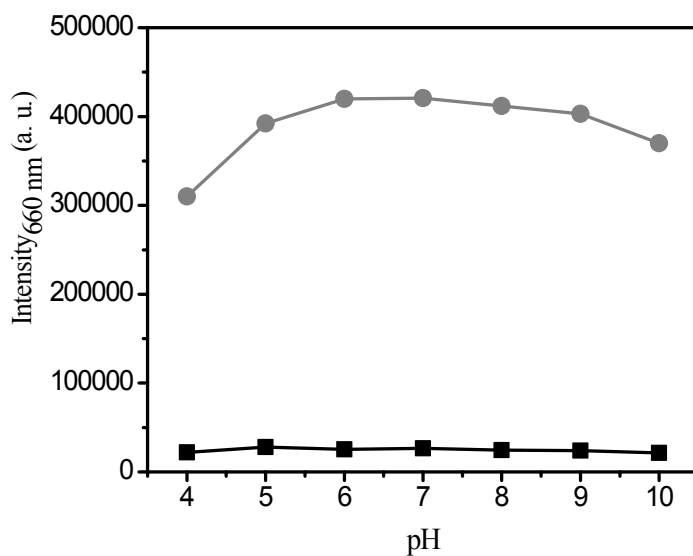

**Figure S9.** Fluorescence intensity of **F2** (10  $\mu\text{M}$ ; ■) and after addition of  $\text{Hg}^{2+}$  (30  $\mu\text{M}$ , ●) in methanol-water (9:1, v/v, 2 mM HEPES) medium as a function of different pH values. Excitation wavelength was 494 nm.

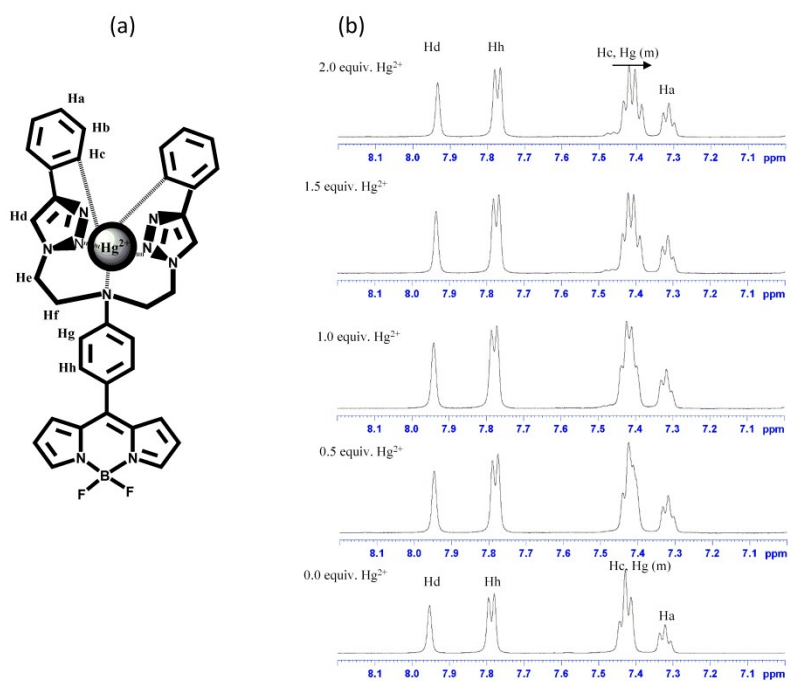

**Figure S10.** (a) Binding model; (b) Partial  $^1\text{H}$  NMR spectra of **F2** (5mM) in the absence or presence of increasing  $\text{Hg}^{2+}$  in  $\text{DMSO-d}_6$ .

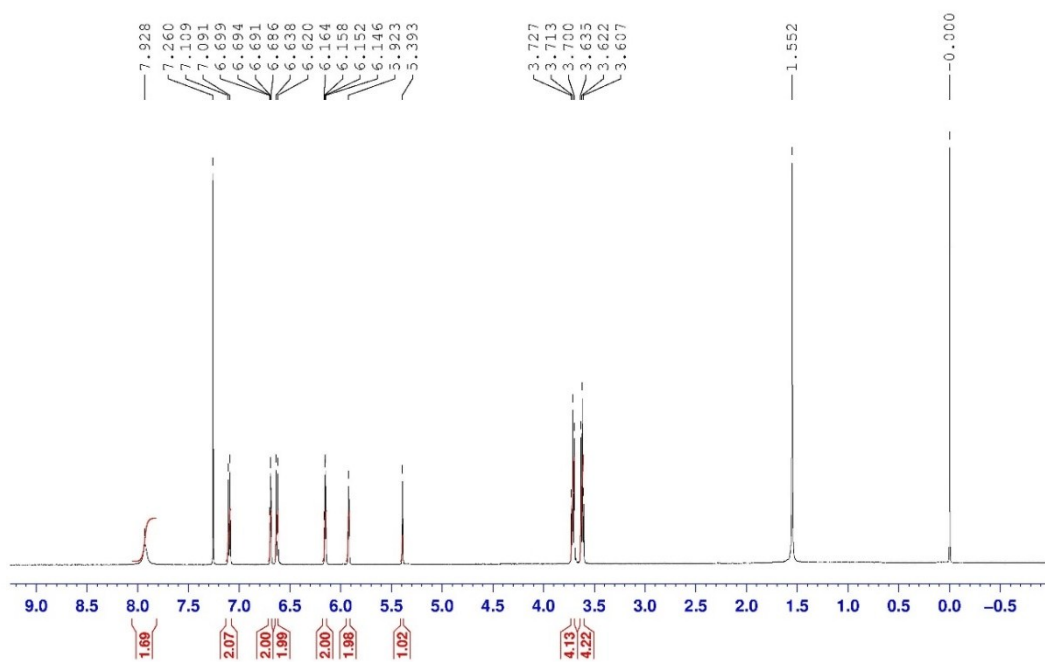

Figure S11.  $^1\text{H}$  spectrum of Compound **2** in  $\text{CDCl}_3$

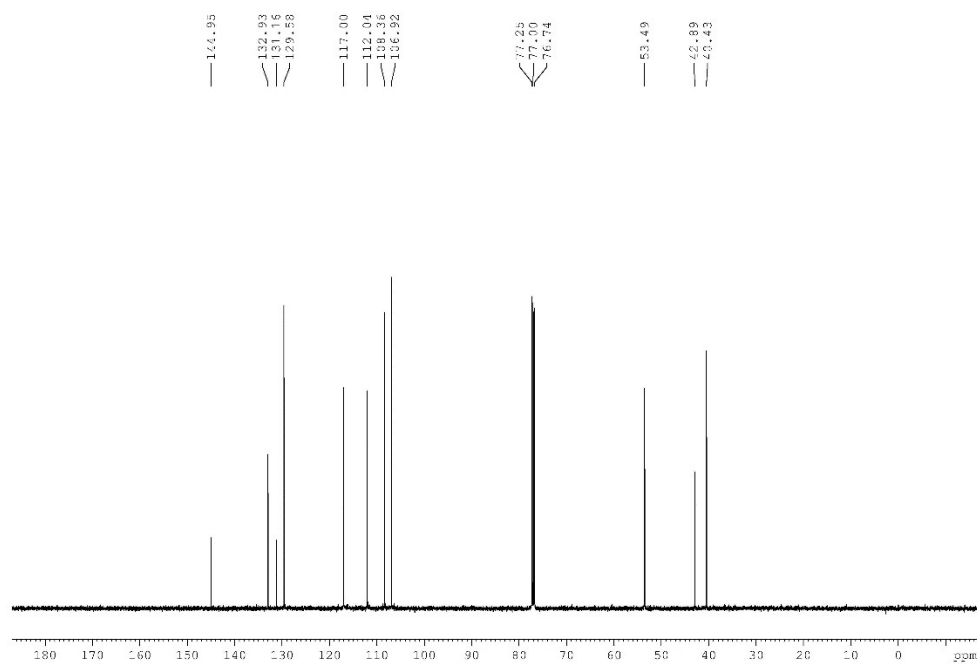

Figure S12.  $^{13}\text{C}$  spectrum of Compound **2** in  $\text{CDCl}_3$

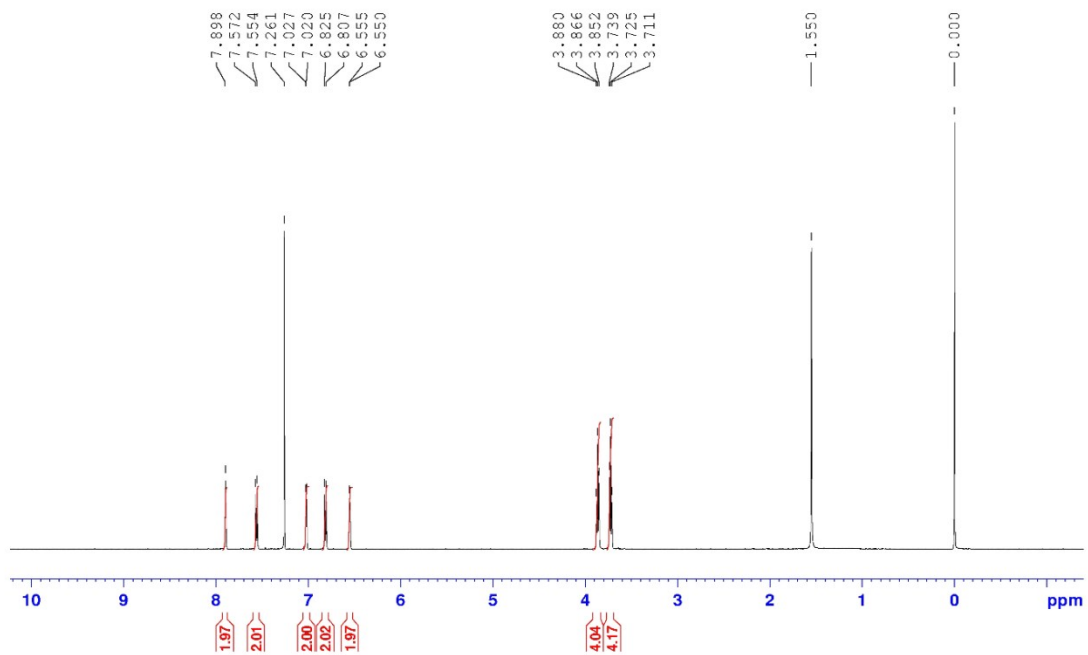

Figure S13.  $^1\text{H}$  spectrum of Compound **3** in  $\text{CDCl}_3$

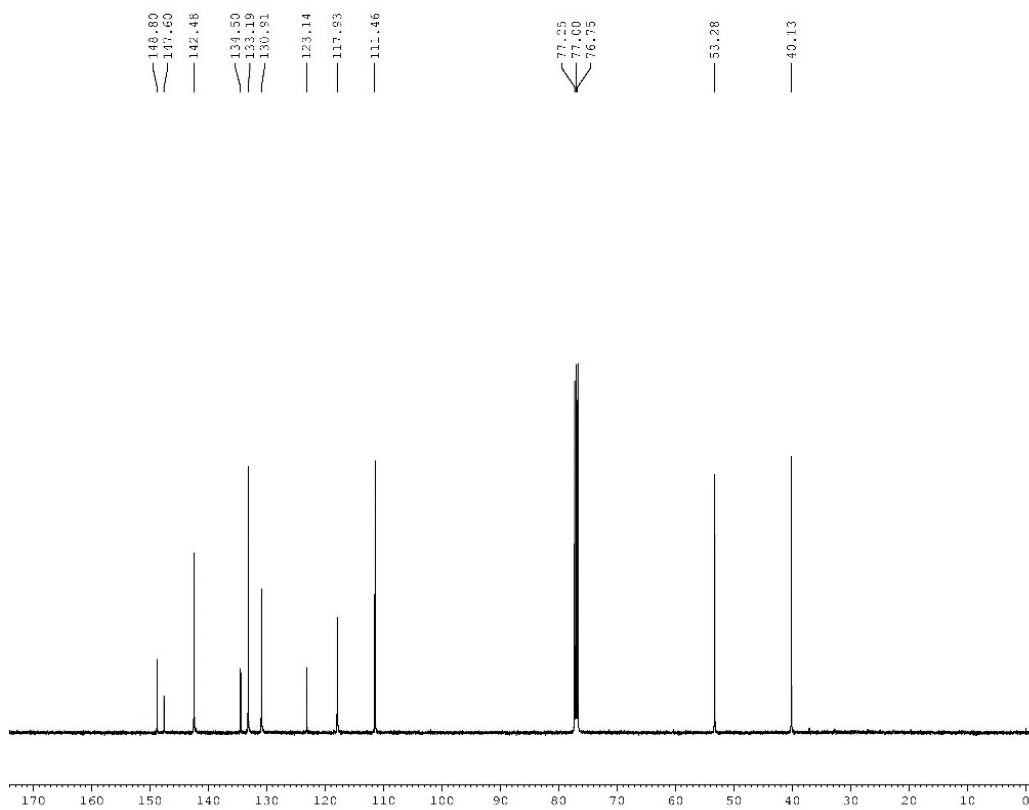

Figure S14.  $^{13}\text{C}$  spectrum of Compound **3** in  $\text{CDCl}_3$

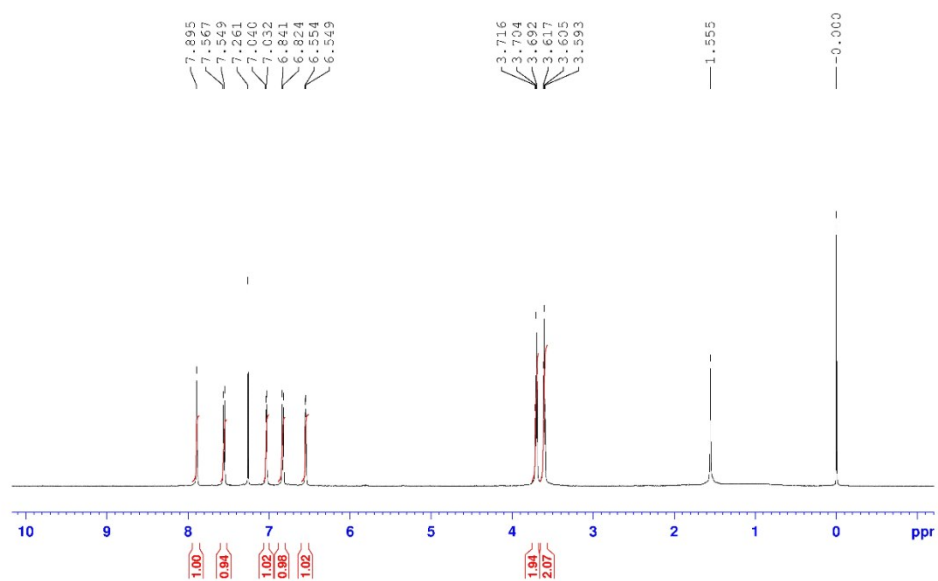

**Figure S15.**  $^1\text{H}$  spectrum of Compound **4** in  $\text{CDCl}_3$

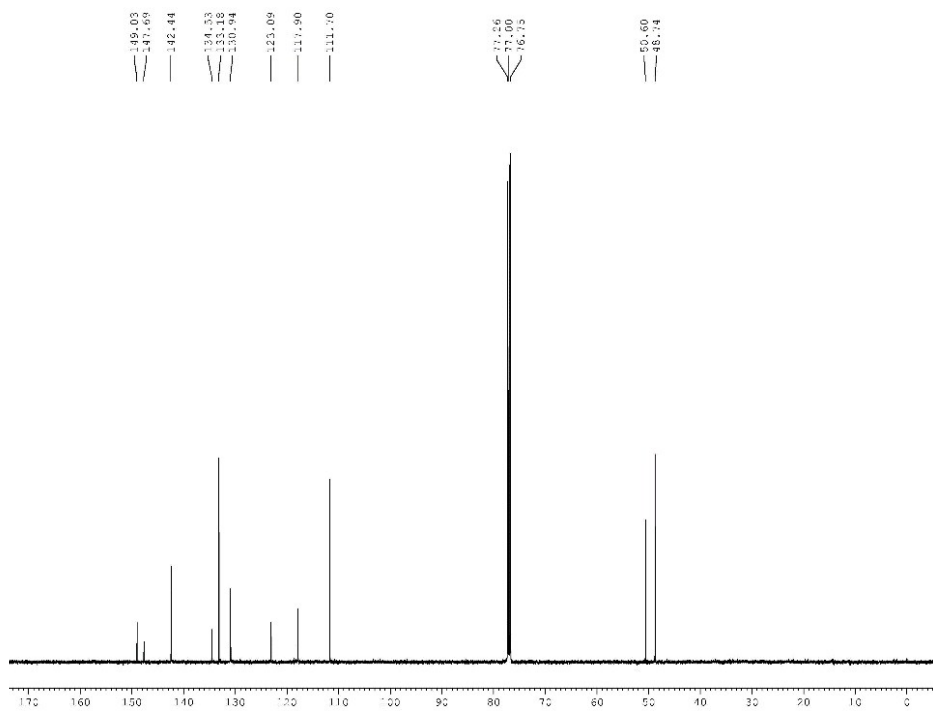

**Figure S16.**  $^{13}\text{C}$  spectrum of Compound **4** in  $\text{CDCl}_3$

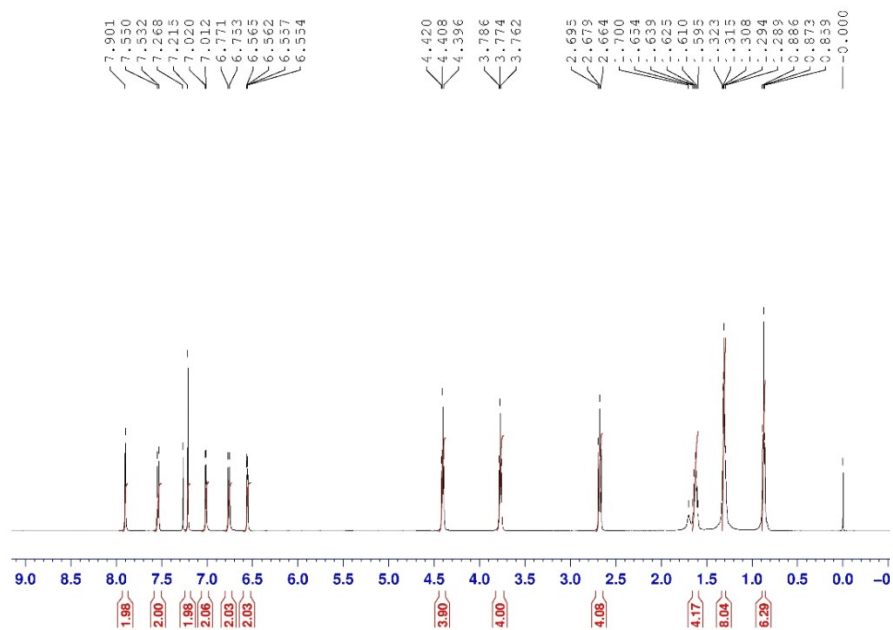

Figure S17.  $^1\text{H}$  spectrum of F1 in  $\text{CDCl}_3$

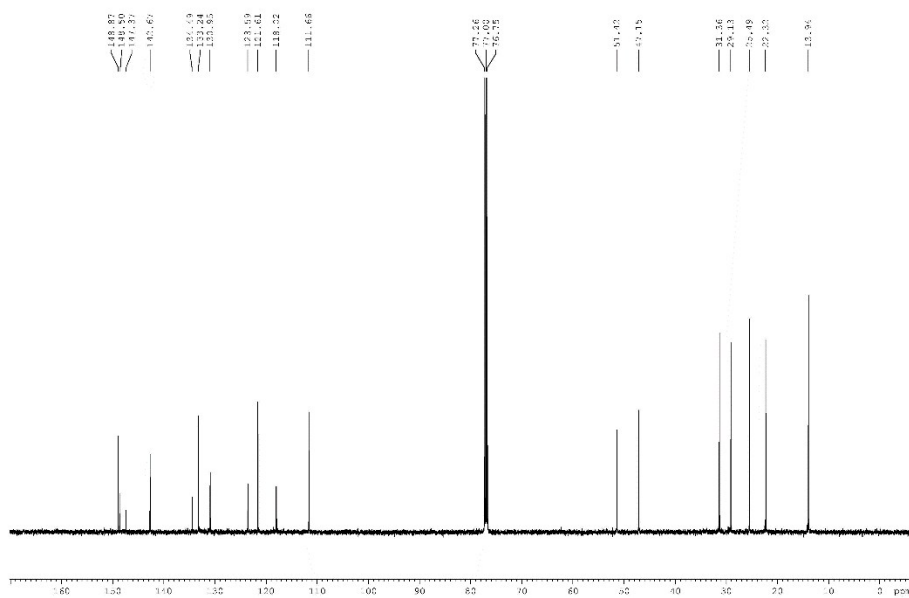

Figure S18.  $^{13}\text{C}$  spectrum of F1 in  $\text{CDCl}_3$

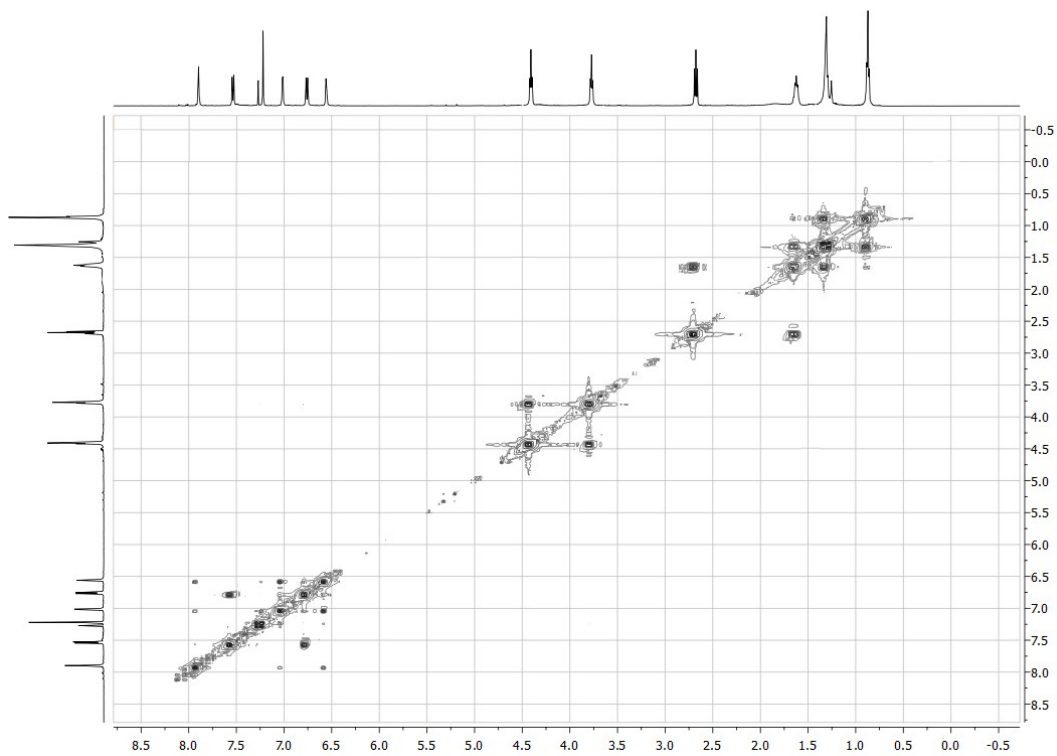

Figure S19.  $^1\text{H}$  COSY spectrum of F1 in  $\text{CDCl}_3$

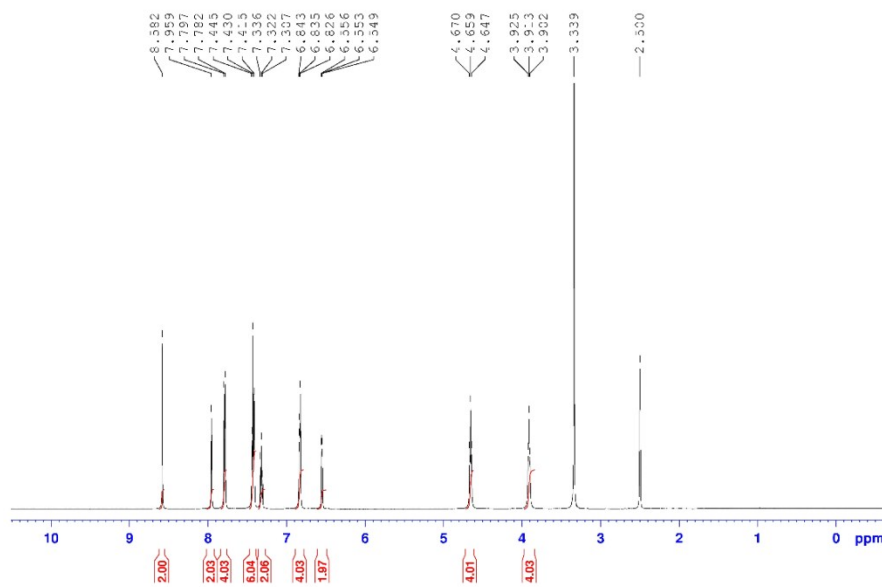

Figure S20.  $^1\text{H}$  spectrum of F2 in  $\text{DMSO-d}_6$

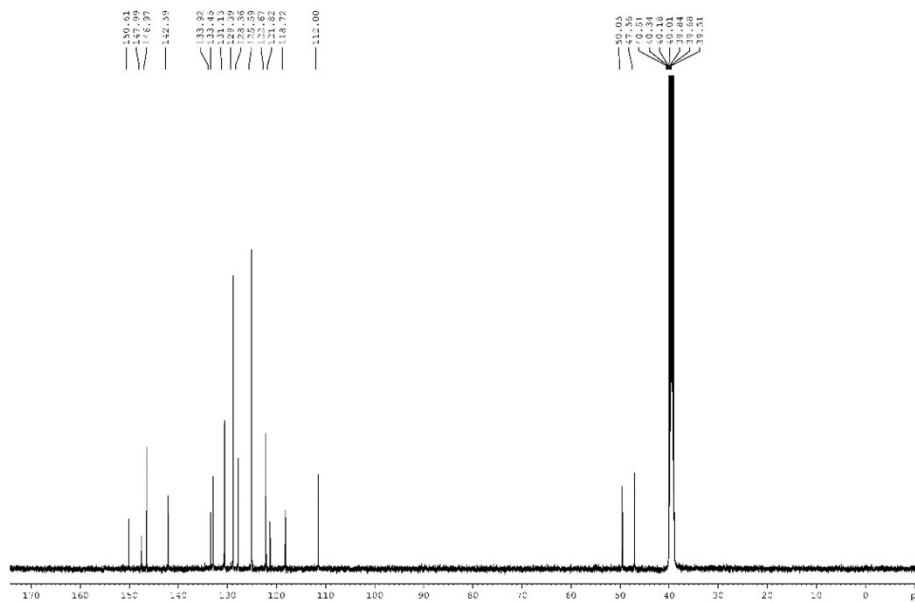

**Figure S21.**  $^{13}\text{C}$  spectrum of **F2** in  $\text{DMSO-d}_6$

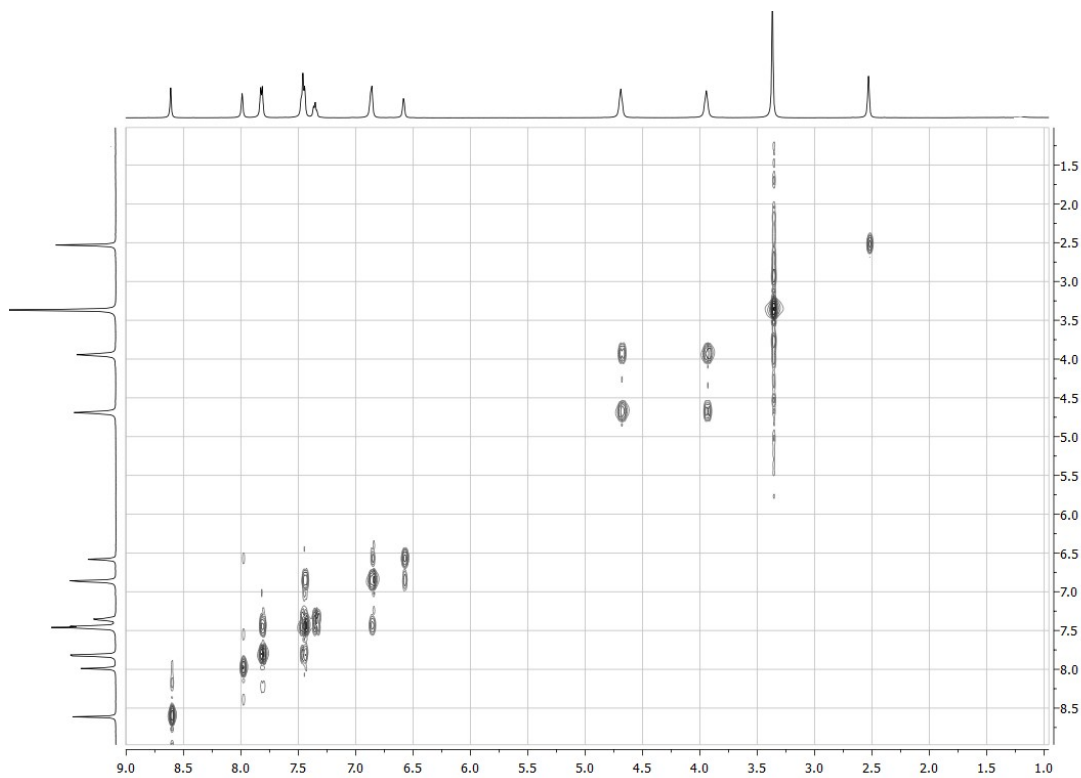

**Figure S22.**  $^1\text{H}$  COSY spectrum of **F2** in  $\text{DMSO-d}_6$
